# Supplementary material for: Cytotoxic T lymphocyte antigen 4 expression in human breast cancer: implications for prognosis
Source: Springer Nature journal article supplement (doi:10.1007/s00262-015-1696-2), 2015-04-16
Supplement: MOESM1 [file 8232950]

**Supplementary table 1. Prognostic factors for overall survival (OS) and disease-free survival (DFS) in univariate cox analysis.**

| Influencing factors   | DFS                |         | OS                  |         |
|-----------------------|--------------------|---------|---------------------|---------|
|                       | HR (95%CL)         | P value | HR(95%CL)           | P value |
| Clinical stage        | 2.599(1.509-4.478) | 0.001   | 3.156(1.736-5.738)  | <0.001  |
| Age                   | 0.489(0.237-1.009) | 0.053   | 0.673(0.317-1.427)  | 0.301   |
| Menstrual status      | 0.995(0.489-2.023) | 0.988   | 1.315(0.627-2.755)  | 0.469   |
| ER                    | 0.568(0.286-1.128) | 0.106   | 0.422(0.203-0.879)  | 0.018   |
| PR                    | 0.473(0.237-0.944) | 0.034   | 0.368(0.173-0.782)  | 0.009   |
| HER-2                 | 3.977(1.990-7.947) | <0.001  | 5.398(2.601-11.200) | <0.001  |
| Thrombosis            | 2.680(1.332-5.395) | 0.006   | 2.993(1.420-6.310)  | 0.004   |
| SBR grading           | 3.204(1.712-5.997) | <0.001  | 3.904(1.982-7.687)  | <0.001  |
| Ki67                  | 2.119(1.042-4.311) | 0.038   | 2.556(1.163-5.617)  | 0.019   |
| Adjuvant chemotherapy | 1.115(0.460-2.702) | 0.809   | 0.923(0.376-2.270)  | 0.862   |

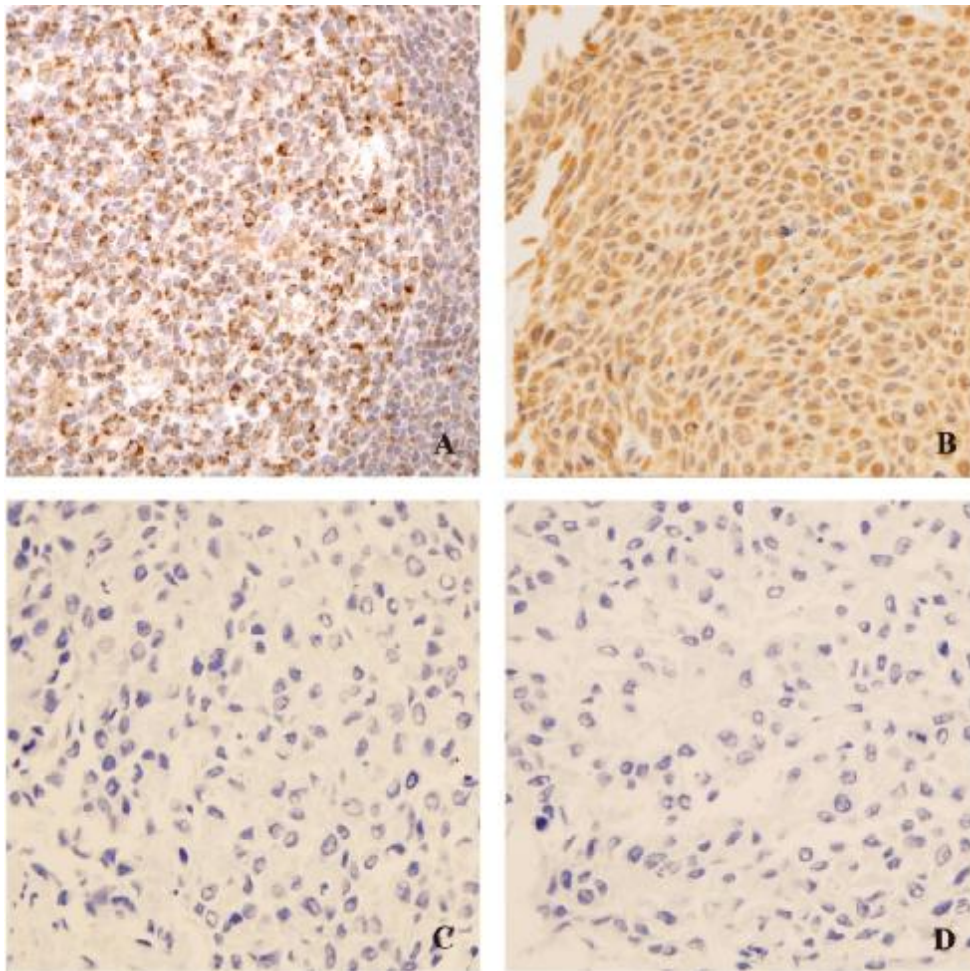

**Supplementary figure1 Positive control and negative controls for rabbit anti-human CTLA-4**

**IgG.** (A) Sections of human tonsil biopsy specimens with confirmed high expression of CTLA-4 molecules served as **positive control**; (B) Positive immunostaining for CTLA-4 in breast cancer cells; (C) Sections of breast cancer specimens incubated with the primary antibody diluent with no primary antibody were used as the **negative control 1**; (D) Sections of breast cancer specimens incubated with primary antibody (1:100 dilution, bs-1179R, Beijing Biosynthesis Biotechnology Co., Ltd, China) premixed with CTLA-4 peptide (bs-1179P, Beijing Biosynthesis Biotechnology Co., Ltd, China) were used as the **negative control 2**.

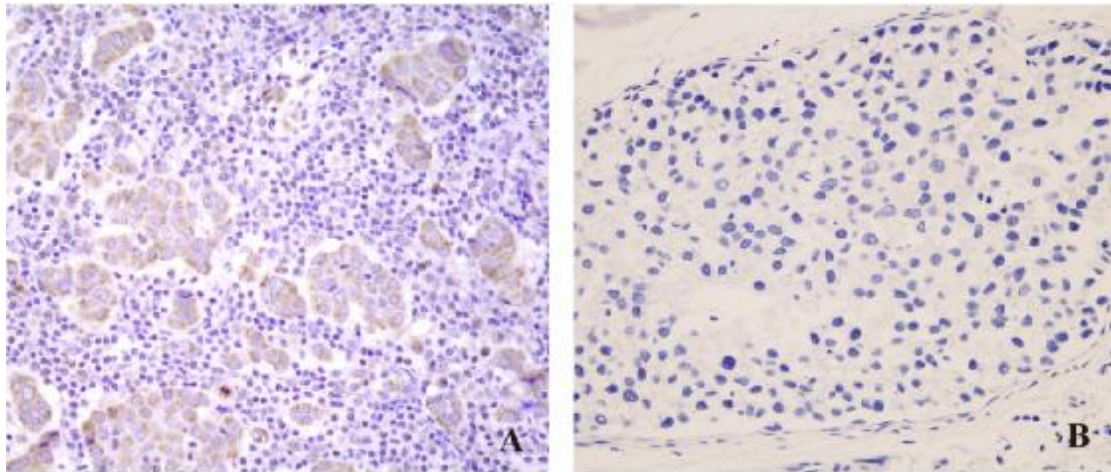

**Supplementary figure2 Examples for CTLA-4 staining intensities. (A)** Tumor cell staining intensity score 1. **(B)** Tumor cell staining intensity score 0.

Cancer immunology, immunotherapy (submitted in 2014) – Haiming Yu et al.

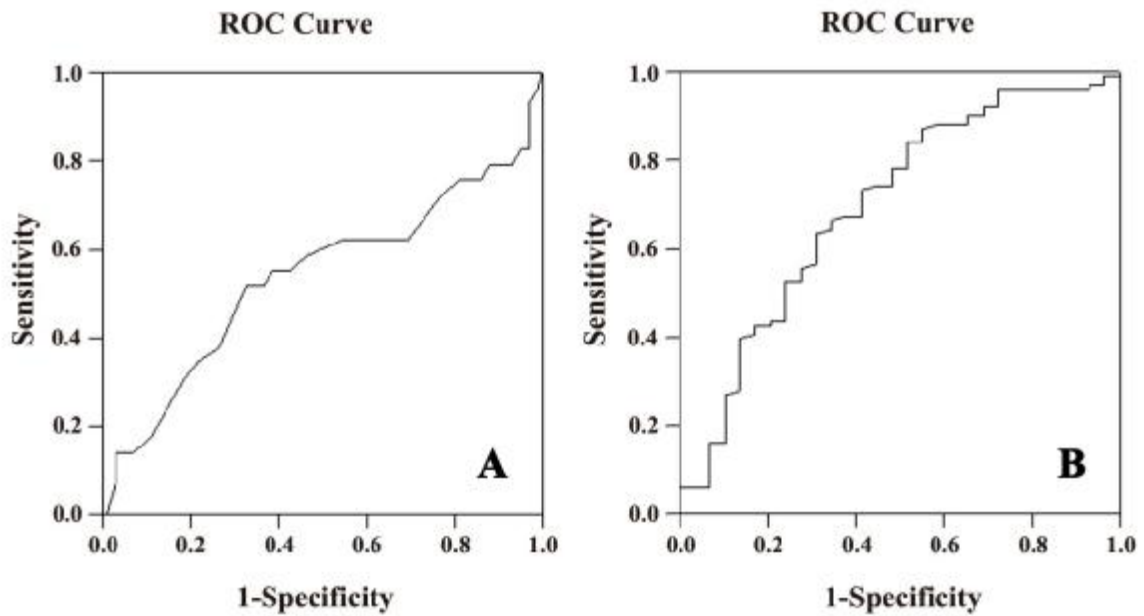

**Supplementary figure 3 Receiver operator characteristic (ROC) curves of CTLA-4 expression**

**for overall survival in breast cancer patients. (A)** Tumor CTLA-4 expression: sensitivity=51.7%;

specificity=67.3%; area under the curve=0.537; SE=0.069; **(B)** Density of interstitial CTLA-4<sup>+</sup>

lymphocytes: sensitivity=63.4%; specificity=69%; area under the curve=0.695; SE=0.058.
